# Supplementary material for: Synthesis and evaluation of the biological activity of N′-[2-oxo-1,2 dihydro-3H-indol-3-ylidene] benzohydrazides as potential anticancer agents
Source: Royal Society of Chemistry journal article supplement (doi:10.1039/c5ra01528f), 2015-01-01
Supplement: c5ra01528f1.pdf [file c5ra01528f1.pdf]

5a

5d

5e

5f

5g

5h

5i

5j



5k



5m

5n

50

5p

5q

5r



5s

5t

5u

5v

5w

5x

5y

5c



5e

5f

5g

5h

5i

5j

5k





5m

50

5p

5q

5r

5t

5u

5v



5w

5x

5y
